# Phylogeny and distribution of Y-chromosomal haplotypes in domestic, ancient and wild goats

Isaac J. Nijman<sup>1,2</sup>, Benjamin D. Rosen<sup>3</sup>, Zhuqing Zheng<sup>4</sup>, Yu Jiang<sup>4</sup>, Tristan Cumer<sup>5</sup>, Kevin G. Daly<sup>6</sup>, Valentin A. Bâlțeanu<sup>7</sup>, Beate Berger<sup>8</sup>, Thor Blichfeldt<sup>9</sup>, Geert Boink<sup>10</sup>, Sean Carolan<sup>11</sup>, Vlatka Cubric-Curik<sup>12</sup>, Juha Kantanen<sup>13</sup>, Amparo Martínez<sup>14</sup>, Raffaele Mazza<sup>15</sup>, Negar Khayat-zadeh<sup>8</sup>, Namshin Kim<sup>16</sup>, Nadjat-Amina Ouchene-Khelifi<sup>17</sup>, Filipe Pereira<sup>18</sup>, Anne da Silva<sup>19</sup>, Mojca Simčič<sup>20</sup>, Johann Sölkner<sup>8</sup>, Alison Sutherland<sup>21</sup>, Johannes Tigchelaar<sup>10</sup>, Econogene Consortium<sup>22</sup>, Paolo Ajmone-Marsan<sup>23</sup>, Daniel G. Bradley<sup>6</sup>, Licia Colli<sup>23</sup>, François Pompanon<sup>5</sup> and Johannes A. Lenstra<sup>1\*</sup>

<sup>1</sup> Faculty of Veterinary Medicine, Utrecht University, Netherlands

<sup>2</sup> Center for Molecular Medicine and Oncode Institute, University Medical Center Utrecht, Utrecht University, The Netherlands

<sup>3</sup> Animal Genomics and Improvement Laboratory, Agriculture Research Service, Beltsville, MD, United States

<sup>4</sup> Key Laboratory of Animal Genetics, Breeding and Reproduction of Shaanxi Province, College of Animal Science and Technology, Northwest A&F University, Yangling, China

<sup>5</sup> Université Grenoble Alpes, Université Savoie Mont Blanc, CNRS, LECA, Grenoble, France

<sup>6</sup> Smurfit Institute of Genetics, Trinity College Dublin, Dublin, Ireland

<sup>7</sup> Faculty of Animal Science and Biotechnologies, University of Agricultural Sciences and Veterinary Medicine of Cluj-Napoca, Cluj-Napoca, Romania

<sup>8</sup> University of Natural Resources and Life Sciences Vienna (BOKU)

<sup>9</sup> Norwegian Association of Sheep and Goat Breeders, Aas, Norway

<sup>10</sup> Stichting Zeldzame Huisdierrassen, Wageningen, The Netherlands

<sup>11</sup> Old Irish Goat Society, Mulranny, Ireland

<sup>12</sup> Dep. Animal Science, University of Zagreb, Zagreb, Croatia

<sup>13</sup> Natural Resources Institute Finland (Luke), Helsinki, Finland

<sup>14</sup> Dep. Genética, Universidad de Córdoba, Córdoba, Spain

<sup>15</sup> Laboratorio Genetica e Servizi, Agrotis srl, Cremona, Italy

<sup>16</sup> Korea Research Institute of Bioscience and Biotechnology (KRIBB), Daejeon, South Korea

<sup>17</sup> Laboratory of Biotechnologies related to Animal Reproduction, Science Veterinary Institute, University of Blida, Blida, Algeria

<sup>18</sup> IDENTIFICA, UPTEC, Porto, Portugal

<sup>19</sup> Univ. Limoges, INRA, Pereine EA7500, USC1061 Gamaa, F-87000 Limoges, France

<sup>20</sup> Univ. Ljubljana, Biotechnical Faculty, Dep. Animal Science, Ljubljana, Slovenia

<sup>21</sup> New Zealand Arapawa Goat Association, New Zealand

<sup>22</sup> See the list at the end of this paper

<sup>23</sup> Dip. di Scienze Animali, della Nutrizione e degli Alimenti, Univ. Cattolica del S. Cuore di Piacenza, Piacenza, Italy

\* **Correspondence:**

J.A. Lenstra

[j.a.lenstra@uu.nl](mailto:j.a.lenstra@uu.nl)

44

45 **Keywords: goat, genome, Y-chromosome, haplotype, migration, bottleneck,**  
46 **introgression**

47

48 **Abstract**

49

50 The male-specific part of the Y-chromosome is in mammalian and many other species the  
51 longest haplotype that is inherited without recombination. By its paternal transmission it has a  
52 small effective population size in species with dominant males. In several species, Y-  
53 chromosomal haplotypes are sensitive markers of population history and introgression.  
54 Previous studies have identified in domestic goats four major Y-chromosomal haplotypes  
55 Y1A, Y1B, Y2A and Y2B with a marked geographic differentiation and several regional  
56 variants. In this study we used published whole-genome sequences of 70 male goats from 16  
57 modern breeds, 11 ancient-DNA samples and 29 samples from seven wild goat species. We  
58 identified single-copy male-specific SNPs in four scaffolds, containing *SRY*, *ZFY*, *DBY* with  
59 *SSX3Y* and *UTY*, and *USP9Y* with *UMN2001*, respectively. Phylogenetic analyses indicated  
60 haplogroups corresponding to the haplotypes Y1B, Y2A and Y2B, respectively, but Y1A was  
61 split into Y1AA and Y1AB. All haplogroups were detected in ancient DNA samples from  
62 southeast Europe and, with the exception of Y1AB, in the bezoar goat, which is the wild  
63 ancestor of the domestic goats. Combining these data with those of previous studies and with  
64 genotypes obtained by Sanger sequencing or the KASP assay yielded haplogroup distributions  
65 for 132 domestic breeds or populations. The phylogeographic differentiation indicated  
66 paternal population bottlenecks on all three continents. This possibly occurred during the  
67 Neolithic introductions of domestic goats to those continents with a particularly strong  
68 influence in Europe along the Danubian route. This study illustrates the power of the Y-  
69 chromosomal haplotype for the reconstructing the history of mammalian species with a wide  
70 geographic range.

71

## 72 **1. Introduction**

73

74 Because of its absence or recombination, the male part of the mammalian Y-chromosomes  
75 is by far the longest haplotype that is stably transmitted across generations (Hughes et al.,  
76 2015). Together with its inheritance from father to son, it is a highly informative marker for  
77 the paternal origin of species, populations or individuals with a much stronger  
78 phylogeographic differentiation than observed for mitochondrial or autosomal DNA. The  
79 highly informative Y-chromosomal markers are now widely exploited in population-genetic  
80 studies of humans (Jobling and Tyler-Smith, 2017; Kivisild, 2017), cattle (Edwards et al.,  
81 2011; Xia et al., 2019), horse (Wallner et al., 2017; Wutke et al., 2018; Felkel et al., 2019a)  
82 water buffalo (Zhang et al., 2016), sheep (Meadows and Kijas, 2009; Zhang et al., 2014),  
83 camel (Felkel et al., 2019b), pigs (Guirao-Rico et al., 2018) and dogs (Natanaelsson et al.,  
84 2006; Oetjens et al., 2018).

85

86 A preliminary analysis of the Y-chromosomal diversity in European and Turkish goats  
87 defined the three haplotypes Y1A, Y1B and Y2, showing strong geographic differentiation  
(Lenstra and Econogene Consortium, 2005). The same haplotypes were found in goats from

88 Portugal and North-Africa (Pereira et al., 2009), Turkey (Cinar Kul et al., 2015), east and  
 89 south Asia (Waki et al., 2015), Switzerland and Spain (Vidal et al., 2017) with additional  
 90 haplotypes Y2B in east Asia, Y2C in Turkish Kilis goats, and Y1B2 as well Y1C mainly in  
 91 Switzerland (Table 1). However, these haplotypes are based on a low number of SNPs in or  
 92 near *DBY-1*, *SRY* and *ZFY*. Thus, it is not clear if the haplotypes represent major haplogroups  
 93 or local variants, if other major haplogroups exist, and which of the Y-chromosomal variants  
 94 already existed in the earlier domestic goats and in their wild ancestor, the bezoar (Amills et  
 95 al., 2017).

96  
 97  
 98

99 **Table 1.** Haplotypes identified previously or in this study by ABI sequencing (Lenstra, 2005;  
 100 indicated by ddSeq), whole-genome sequencing, KASP genotyping, SRA BLAST searches.  
 101 Mutations are relative to haplogroup Y1AB, which in previous studies together with Y1AA  
 102 was represented by haplotype Y1A. Haplotype Y1C belongs to the Y1B haplogroup. Most of  
 103 the diagnostic SNPs used here for KASP or SRA searches are within the segments covered by  
 104 dideoxy sequencing.

105

| Haplotypes         | Diagnostic SNP             | Detection               | Specificity   | Range, breed                                | Reference              |
|--------------------|----------------------------|-------------------------|---------------|---------------------------------------------|------------------------|
| <b>Main types</b>  |                            |                         |               |                                             |                        |
| Y1AA               | NW_017189563.1 g.G280574>T | ddSeq, SRA search       | Y1AA          | Asia <sup>1</sup>                           | This study             |
| Y1AB               |                            |                         |               | Europe, Asia <sup>1</sup>                   | Lenstra, 2005          |
| Y1B                | NW_017189563.1 g.T280306>A | ddSeq, SRA search, KASP | Y1B, Y1C      | Europe, North Africa                        | Lenstra, 2005          |
|                    | NW_017189885.1 g.T104701>C | SRA search              | Y1B, Y1C      | Europe, North Africa                        | This study             |
| Y2A                | NW_017189563.1 g.G277537>T | ddSeq, SRA search       | Y2A, Y2C, Y2C |                                             | Lenstra, 2005          |
|                    | NW_017189563.1 g.A278523>G | ddSeq, SRA search       | Y2A, Y2C, Y2C |                                             | Lenstra, 2005          |
|                    | NW_017189563.1 g.T280046>A | ddSeq                   | Y2A, Y2C, Y2C |                                             | Lenstra, 2005          |
|                    | NW_017189563.1 g.G280433>A | ddSeq                   | Y2A, Y2C, Y2C |                                             | Lenstra, 2005          |
|                    | NW_017189685.1 g.A43279>C  | ddSeq                   | Y2A, Y2C, Y2C |                                             | Lenstra, 2005          |
|                    | NW_017189685.1 g.C43464>T  | ddSeq                   | Y2A, Y2C, Y2C |                                             | Lenstra, 2005          |
|                    | NW_017189885.1 g.A11686>G  | ddSeq, KASP             | Y2A, Y2C, Y2C |                                             | Lenstra, 2005          |
| Y2B                | NW_017189563.1 g.A280113>G | ddSeq, SRA search       | Y2B           | East, southeast Asia                        | Waki et al., 2015      |
| <b>Local types</b> |                            |                         |               |                                             |                        |
| Y1AB2              | NW_017189563.1 g.A277871>G | ddSeq                   | Y1AB2         | Albanian DUK, LIQ; Romanian CAR; German TWZ | This study             |
| Y1B2               | NW_017189885.1 g.G12927>A  |                         | Y1B2          | Switzerland, Italy                          | Vidal et al., 2017     |
| Y1C                | NW_017189563.1 g.A279212>C | ddSeq                   | Y1C           | Swiss PCG, VZC; Italian GAR                 | Vidal et al., 2017     |
| Y2C                | NW_017189885.1 g.A11760>C  |                         | Y2C           |                                             | Cinar-Kul et al., 2015 |

106

<sup>1</sup> Y1A is present in Africa and may represent either Y1AA or Y1AB or both

107 In this study, we use whole-genome sequences (WGSs) to systematically characterize the  
108 SNP-level variation in a large part of the single-copy male-specific part of the caprine Y-  
109 chromosome. In addition, we determined the Y-chromosomal haplogroups in goats  
110 originating from several European, Asian or African countries, in ancient goat DNA samples  
111 and in the wild bezoar. We observed a strong phylogeographic structure as the result of  
112 paternal bottlenecks during the Neolithic migrations and found evidence for recent  
113 introgressions in Asian landraces, which is essential information for breed management and  
114 conservation.

115

## 116 **2. Methods**

117

### 118 **2.1 WGS data, filtering and tree construction.**

119

120 We selected four Y-chromosomal scaffolds carrying single-copy genes without the  
121 UMN2303 Y-chromosomal repeat (Table 2). From the Short Read Archive (SRA) a VCF file  
122 containing the sequences of these scaffolds in 70 male goats (Table 3), 30 of which were from  
123 central and east Asia, and 107 female goats from the same source laboratories. After  
124 excluding dense clusters of SNPs, we obtained 5356 SNPs, from which 2350 were  
125 hemizygous, were not scored in females, had scores in >95% of the males and had a minor  
126 allele frequency of >2% in male domestic goats. Allele-sharing distances were calculated  
127 using PLINK, and visualized in a Neighbor-Joining tree by using the programs SPLITSTREE  
128 (Huson and Bryant, 2006) and MEGA (Tamura et al., 2011).

129

### 130 **2.2 Haplogroups in 132 goat breeds.**

131 We differentiating the major Y-chromosomal haplogroups Y1AA, Y1AB, Y1B, Y2A and  
132 Y2B for 1720 domestic goats from 132 breeds by combining data from several sources as  
133 detailed per breed in Table 4:

- 134 (1) From the goat panel collected for the Econogene project, DNA samples of 353 male goats  
135 from 38 European or southwestern Asian breeds were analyzed by PCR amplification and  
136 dideoxy-sequencing of segments within the *DBY*, *SRY* and *ZFY* genes (Lenstra and  
137 Econogene Consortium, 2005) as described previously for bovine samples (Nijman et al.,  
138 2008; Edwards et al., 2011) and using the primers listed in Table 5.
- 139 (2) We used published data for 90 goats from 5 Portuguese breeds or from Morocco (Pereira  
140 et al., 2009), for 211 goats from 10 Asian breeds (Waki et al., 2015), for 181 goats from 8  
141 Turkish breeds (Cinar Kul et al., 2015) and for 270 goats from 26 Spanish or Swiss breeds  
142 (Vidal et al., 2017).
- 143 (3) 362 DNA samples (57 breeds) from several sources, including the AdaptMap panel (Colli  
144 et al., 2018) were genotyped by the KASP assay (Table 4).
- 145 (4) For 90 goats from 15 breeds genotypes were obtained by BLAST searching of the Short-  
146 Read Archive (SRA).

147

148

149

150 **Table 2.** X- and Y-chromosomal scaffolds for the goat reference genome.

151

| scaffold       | length (bp) | genes                  |
|----------------|-------------|------------------------|
| NW_017189563.1 | 528190      | <i>SRY</i>             |
| NW_017189618.1 | 458718      | <i>USP9Y, UMN2001</i>  |
| NW_017189685.1 | 386696      | <i>DBY, DDX3Y, UTY</i> |
| NW_017189885.1 | 194156      | <i>ZFY</i>             |

152

153 For samples collected by Cinar-Kul (2015) and Vidal et al. (2017) or analyzed by KASP  
154 before genomic data became available, Y1AA and Y1AB have been both scored as Y1A  
155 haplotype. Several of these samples did not contain Y1A or belonged to breeds for which  
156 additional data were available (Table 3). However, for 31 breeds we only have the Y1A  
157 frequency. Likewise, Vidal et al. (2017) and the Kasp assay did not differentiate Y2A and  
158 Y2B. Since sequence data indicate that Y2B does not occur in modern domestic goats from  
159 Europe, Anatolia and Iran, we assigned all Y2 scores in European and African goats to Y2A.

160 Genotypes were extracted from WGS data for ancient DNA samples (Daly et al. 2018) and  
161 for bezoar samples (Alberto et al., 2018).

162

### 163 3. Results and Discussion

164

165 The four selected scaffolds (Table 1) cover together 1,567,760 bp of the male-specific part of  
166 the caprine Y-chromosome and contain the SNPs that in previous work defined the major  
167 haplotypes Y1A, Y1B, Y2A and Y2B (Table 1). A phylogenetic tree of the Y-chromosomes  
168 of 70 goats (Fig. 1) shows five major haplogroups. Three haplogroups contains the previously  
169 identified haplotypes Y1B, Y2A and Y2B, whereas the Y1A haplotypes belong to either  
170 haplogroups Y1AA and Y1AB. In this panel we did not find goats with the local Y1C and  
171 Y2C sequences (Table 1).

172 Remarkably, with the exception of Y1B the haplogroups have all been found in Iranian  
173 bezoar samples (Fig. 3, Table 4), whereas all haplogroups, including Y1B, were detected in  
174 ancient goat samples.

175 Geographic plots of haplogroup frequencies show a considerable spatial differentiation,  
176 which resonates the strong phylogeography displayed by autosomal SNPs (Colli et al., 2018),  
177 but is in clear contrast with the phylogenetic structure displayed by mtDNA haplogroups  
178 (Luikart et al., 2001; Naderi et al., 2007, 2008; Zhao et al., 2014b, 2014a). Most likely, by a  
179 series of bottlenecks in the male lineage subcontinents have different major haplogroups,  
180 while none has a global-wide coverage:

181 - Haplogroup Y2B is absent in Europe, Africa and west Asia, but became a major haplotype  
182 in east Asia and southeast Asian, where Y2A is not represented. In contrast, it is observed in  
183 ancient goat from Medieval Georgia and Neolithic Iran (ca. 6,000 BCE), supporting an origin  
184 of east Asian goat from regions east of Zagros Mountains.

185 - Y2A is in northern and central Europe only found in the crossbred AngloNubian (see  
186 below), but is the predominant haplogroup in central, eastern and southern Africa.

187 - Haplogroup Y1B is predominant in northern Europe, but outside Europe and North African  
188 has only been found in one Karamonja animal, in the Korean native breed and in exported

189 Saanen populations. The different Y2A and Y1B frequencies in north-central vs southern  
190 Europe may reflect the Neolithic migrations following the Danube and the Mediterranean  
191 routes, respectively (Cymbron et al., 2005; Tresset and Vigne, 2007; Rivollat et al., 2015)  
192 with the strongest bottlenecks along the northernmost migrations.

193 - Y1AA is sporadic in Europe and has been observed also in Neolithic Serbia (ca. 6,000  
194 BCE), but is present in Asia (Fig. 3).

195 Deviations from the general pattern may very well reflect major introgressions. A well-  
196 known example is the Anglo-Nubian, which originated in England by crossing Indian or  
197 African imported goats with local breeds and is in our panel the only northern-European breed  
198 carrying Y2A.

199 There were two out-of-range findings of Y1B, in the Uganda Karamonja and in the  
200 Korean native breeds. Because of the popularity of Swiss dairy goats in both Uganda  
201 (NAADS, 2005) and Korea (Kim et al., 2019), crossbreeding again is the most likely  
202 explanation.

203 We conclude that the Y-chromosomal haplotype distribution reveals expansion and  
204 crossbreeding events, as observed also for the human paternal lineages (Poznik et al., 2016;  
205 Batini and Jobling, 2017), and illustrates the power of Y-chromosomal markers for inferring  
206 the genetic origin of mammalian populations.

207

## 208 **Conflict of Interest**

209

210 The authors declare that the research was conducted in the absence of any commercial or  
211 financial relationships that could be construed as a potential conflict of interest.

212

## 213 **Authors' contributions**

214

215 IJN, PAM and JAL designed the study; IJN carried out and analyzed the ABI sequencing; TF,  
216 BD, BR, ZZ and YJ analyzed the WGS data; TC and FPo supplied the bezoar genotypes;  
217 KGD and DGB supplied the aDNA data; BR supplied most of the African samples for KASP  
218 genotyping; BB, VAB, TB, SC, VC-C, AdS, JK, NK, AM, RM, FPe MS, AS, JS and JT  
219 collected material or data for other breeds; JAL performed the downstream analysis and wrote  
220 the first draft; and KGD, AM, FPe, MS and PAM contributed to the text.

221

## 222 **Funding**

223 This study was supported by the Croatian Science Foundation (Project ANAGRAMS-IP-  
224 2018-01-8708 "Application of NGS in assessment of genomic variability in ruminants" and  
225 by the European Union (projects ECONOGENE QLK5-CT2001-02461. We are grateful to  
226 Dr E. Cuppen (Utrecht Medical Centre) for access to the dideoxy sequencing facilities.

227

## 228 **Acknowledgements.**

229 This study has benefited from an interaction with Vargoats consortium  
230 (<http://www.goatgenome.org/vargoats.html>).

231

## 232 **Availability of data**



233 The SRA data are in the public domain.

## 234 **Members of the Econogene Consortium:**

235 **Albania:** Hoda Anila, Dobi Petrit, Dep. Animal Production, Fac. Agriculture, Tirana; **Austria:** Baumung  
236 Roswitha, Univ. Natural Resources Applied Life Sciences, Vienna; **Belgium:** Baret Philippe, Fadlaoui Aziz,  
237 Dep. Animal Genetics, Univ. Cath. Louvain, Louvain-la-Neuve; **Cyprus:** Papachristoforou Christos, Agricult.  
238 Research Instit., Nicosia; **Egypt:** El-Barody M.A.A., Animal Production Dep., Fac. Agriculture, Minia Univ.  
239 **France:** Taberlet Pierre, England Phillip, Luikart Gordon, Beja-Pereira Albano, Zundel Stéphanie, Laboratoire  
240 d'Ecologie Alpine (LECA), Univ. Joseph Fourier, Grenoble; Trommetter Michel, Inst. Recherche Agronomique,  
241 Unité d'Économie Sociologie Rurales, Grenoble ; **Germany:** Erhardt Georg, Brandt Horst, Ibeagha-Awemu  
242 Eveline, Lühken, Gesine, Daniela Krugmann, Prinzenberg Eva-Maria, Lipsky Shirin, Gutscher Katja, Peter  
243 Christina, Inst. Tierzucht Haustiergenetik, Justus-Liebig Univ. Giessen; Roosen Jutta, Bertaglia Marco, Dep.  
244 Food Economics Consumption Studies, Univ. Kiel; **Greece:** Georgoudis Andreas, Al Tarrayrah, Jamil, Kliambas  
245 Georgios, Kutita Olga, Karetsou Katerina, Aristotle Univ. Thessaloniki, Fac. Agriculture, Thessaloniki; Ligda  
246 Christina, National Agric. Research Foundation, Thessaloniki; **Hungary:** Istvan Anton, Fesus Lazlo, Research  
247 Inst. Animal Breeding Nutrition, Dep. Genetics, Herceghalom; **Italy:** Ajmone-Marsan Paolo, Canali Gabriele,  
248 Milanese Elisabetta, Pellecchia Marco, Università Cattolica S. Cuore, Piacenza; Carta Antonello, Sechi Tiziana,  
249 Ist. Zootechnico Caseario Sardegna, Sassari; Cicogna Mario, Fornarelli Francesca, Giovenzana Stefano, Marilli  
250 Marta, Ist. Zootechnia Generale, Univ. Studi di Milano; Marletta Donata, Bordonaro S., D'Urso Giuseppe, Dip.  
251 Scienze Agronomiche Produzioni Animali, Univ. Studi Catania; Pilla Fabio, D'Andrea Mariasilvia, Dip. Scienze  
252 Animali Vegetali Ambiente, Univ. Molise, Campobasso; Valentini Alessio, Cappuccio Irene, Pariset Lorraine,  
253 Dip. Produzioni Animali, Univ. Tuscia, Viterbo; **Jordan:** Abo-Shehada Mahamoud, Fac. Veterinary Medicine,  
254 Jordan Univ. Science Technology; **Netherlands:** Lenstra Johannes A., Nijman, Isaïc J., Van Cann, Lisette M.,  
255 Fac. Veterinary Medicine, Utrecht Univ.; **Poland:** Niznikowski Roman, Dominik Popielarczyk, Strzelec Ewa,  
256 Dep. Sheep Goat Breeding, Warsaw Agricultural Univ.; **Romania:** Vlaic Augustin, Dep. Animal Genetics,  
257 Faculty Zootechnics, Univ. Cluj-Napoca; **Spain:** Dunner Susana, Canon Javier, Cortes Oscar, Garcia David,  
258 Univ. Complutense Madrid; **Switzerland:** Caloz Régis, EPFL, Lausanne; Obexer-Ruff Gabriela, Marie-Louise  
259 Glowatzki, Institut für Genetik Ernährung und Haltung von Haustieren, Universität Bern; **Turkey:** Ertugrul  
260 Okan, Veterinary Fac., Ankara Univ.; Togan Inci, Koban Evren, Dep. Biology, Middle East Technical Univ.,  
261 Ankara; **UK:** Bruford Mike, Perez Trinidad, Juma Gabriela, School Biosciences, Cardiff Univ.; Hewitt Godfrey,  
262 Dalamitra Stella, Wiskin Louise, Taylor Martin, Biological Sciences, Univ. East Anglia, Norwich; Jones Sam,  
263 The Sheep Trust, Scarpa Riccardo, Environment Dep., Univ. York

## 264 **References**

265  
266 Alberto, F. J., Boyer, F., Orozco-Terwengel, P., Streeter, I., Servin, B., De Villemereuil, P., et  
267 al. (2018). Convergent genomic signatures of domestication in sheep and goats. *Nat.*  
268 *Commun.* 9. doi:10.1038/s41467-018-03206-y.  
269 Amills, M., Capote, J., and Tosser-Klopp, G. (2017). Goat domestication and breeding: a  
270 jigsaw of historical, biological and molecular data with missing pieces. *Anim. Genet.* 48,  
271 631–644. doi:10.1111/age.12598.  
272 Batini, C., and Jobling, M. A. (2017). Detecting past male-mediated expansions using the Y  
273 chromosome. *Hum. Genet.* 136, 547–557. doi:10.1007/s00439-017-1781-z.  
274 Cinar Kul, B., Bilgen, N., Lenstra, J. A., Korkmaz Agaoglu, O., Akyuz, B., and Ertugrul, O.  
275 (2015). Y-chromosomal variation of local goat breeds of Turkey close to the  
276 domestication centre. *J. Anim. Breed. Genet.* 132, 449–453. doi:10.1111/jbg.12154.  
277 Colli, L., Milanese, M., Talenti, A., Bertolini, F., Chen, M., Crisà, A., et al. (2018). Genome-  
278 wide SNP profiling of worldwide goat populations reveals strong partitioning of  
279 diversity and highlights post-domestication migration routes. *Genet. Sel. Evol.* 50, 1–20.  
280 doi:10.1186/s12711-018-0422-x.  
281 Cymbron, T., Freeman, A. R., Malheiro, M. I., Vigne, J. D., and Bradley, D. G. (2005).  
282 Microsatellite diversity suggests different histories for Mediterranean and Northern  
283 European cattle populations. *Proc. R. Soc. B Biol. Sci.* 272, 1837–1843.  
284 doi:10.1098/rspb.2005.3138.  
285 Edwards, C. J., Ginja, C., Kantanen, J., Pérez-Pardal, L., Tresset, A., Stock, F., et al. (2011).

- 286 Dual origins of dairy cattle farming - Evidence from a comprehensive survey of  
287 european Y-chromosomal variation. *PLoS One* 6. doi:10.1371/journal.pone.0015922.
- 288 Felkel, S., Vogl, C., Rigler, D., Dobretsberger, V., Chowdhary, B. P., Distl, O., et al. (2019a).  
289 The horse Y chromosome as an informative marker for tracing sire lines. *Sci. Rep.* 9, 1–  
290 12. doi:10.1038/s41598-019-42640-w.
- 291 Felkel, S., Wallner, B., Chuluunbat, B., Yadamsuren, A., Faye, B., Brem, G., et al. (2019b). A  
292 first Y-chromosomal haplotype network to investigate Male-driven population dynamics  
293 in domestic and wild bactrian camels. *Front. Genet.* 10, 1–7.  
294 doi:10.3389/fgene.2019.00423.
- 295 Guirao-Rico, S., Ramirez, O., Ojeda, A., Amills, M., and Ramos-Onsins, S. E. (2018).  
296 Porcine Y-chromosome variation is consistent with the occurrence of paternal gene flow  
297 from non-Asian to Asian populations. *Heredity (Edinb)*. 120, 63–76.  
298 doi:10.1038/s41437-017-0002-9.
- 299 Hughes, J. F., Skaletsky, H., Koutseva, N., Pyntikova, T., and Page, D. C. (2015). Sex  
300 chromosome-to-autosome transposition events counter Y-chromosome gene loss in  
301 mammals. *Genome Biol.* 16, 1–9. doi:10.1186/s13059-015-0667-4.
- 302 Huson, D. H., and Bryant, D. (2006). Application of phylogenetic networks in evolutionary  
303 studies. *Mol. Biol. Evol.* 23, 254–267. doi:10.1093/molbev/msj030.
- 304 Jobling, M. A., and Tyler-Smith, C. (2017). Human Y-chromosome variation in the genome-  
305 sequencing era. *Nat. Rev. Genet.* 18, 485–497. doi:10.1038/nrg.2017.36.
- 306 Kim, J. Y., Jeong, S., Kim, K. H., Lim, W. J., Lee, H. Y., and Kim, N. (2019). Discovery of  
307 genomic characteristics and selection signatures in Korean indigenous goats through  
308 comparison of 10 goat breeds. *Front. Genet.* 10, 1–17. doi:10.3389/fgene.2019.00699.
- 309 Kivisild, T. (2017). The study of human Y chromosome variation through ancient DNA.  
310 *Hum. Genet.* 136, 529–546. doi:10.1007/s00439-017-1773-z.
- 311 Lenstra, J. A., and Econogene Consortium (2005). Evolutionary and demographic history of  
312 sheep and goats suggested by nuclear, mtDNA and Y-chromosomal markers. in *The role*  
313 *of biotechnology for the characterization of crop, forestry, animal and fishery genetic*  
314 *resources* (Turin).
- 315 Luikart, G., Gielly, L., Excoffier, L., Vigne, J., Bouvet, J., and Taberlet, P. (2001). Multiple  
316 maternal origins and weak phylogeographic structure in domestic goats. *Proc. Natl.*  
317 *Acad. Sci. U. S. A.* 98, 5927–5932. doi:10.1073/pnas.091591198.
- 318 Meadows, J. R. S., and Kijas, J. W. (2009). Re-sequencing regions of the ovine Y  
319 chromosome in domestic and wild sheep reveals novel paternal haplotypes. *Anim. Genet.*  
320 40, 119–123. doi:10.1111/j.1365-2052.2008.01799.x.
- 321 NAADS (2005). Goat Production Manual.
- 322 Naderi, S., Rezaei, H. R., Pompanon, F., Blum, M. G. B., Negrini, R., Naghash, H. R., et al.  
323 (2008). The goat domestication process inferred from large-scale mitochondrial DNA  
324 analysis of wild and domestic individuals. *Proc. Natl. Acad. Sci. U. S. A.* 105, 17659–  
325 17664. doi:10.1073/pnas.0804782105.
- 326 Naderi, S., Rezaei, H. R., Taberlet, P., Zundel, S., Rafat, S. A., Naghash, H. R., et al. (2007).  
327 Large-scale mitochondrial DNA analysis of the domestic goat reveals six haplogroups  
328 with high diversity. *PLoS One* 2. doi:10.1371/journal.pone.0001012.
- 329 Natanaelsson, C., Oskarsson, M. C. R., Angleby, H., Lundeberg, J., Kirkness, E., and  
330 Savolainen, P. (2006). Dog Y chromosomal DNA sequence: Identification, sequencing  
331 and SNP discovery. *BMC Genet.* 7. doi:10.1186/1471-2156-7-45.
- 332 Nijman, I. J., Van Boxtel, D. C. J., Van Cann, L. M., Marnoch, Y., Cuppen, E., and Lenstra, J.  
333 A. (2008). Phylogeny of Y chromosomes from bovine species. *Cladistics* 24, 723–726.  
334 doi:10.1111/j.1096-0031.2008.00201.x.
- 335 Oetjens, M. T., Martin, A., Veeramah, K. R., and Kidd, J. M. (2018). Analysis of the canid Y-



- 336 chromosome phylogeny using short-read sequencing data reveals the presence of distinct  
337 haplogroups among Neolithic European dogs. *BMC Genomics* 19, 1–9.  
338 doi:10.1186/s12864-018-4749-z.
- 339 Pereira, F., Queirós, S., Gusmão, L., Nijman, I. J., Cuppen, E., Lenstra, J. A., et al. (2009).  
340 Tracing the history of goat pastoralism: New clues from mitochondrial and y  
341 chromosome DNA in North Africa. *Mol. Biol. Evol.* 26, 2765–2773.  
342 doi:10.1093/molbev/msp200.
- 343 Poznik, G. D., Xue, Y., Mendez, F. L., Willems, T. F., Massaia, A., Wilson Sayres, M. A., et  
344 al. (2016). Punctuated bursts in human male demography inferred from 1,244 worldwide  
345 Y-chromosome sequences. *Nat. Genet.* 48, 593–599. doi:10.1038/ng.3559.
- 346 Rivollat, M., Mendisco, F., Pemonge, M. H., Safi, A., Saint-Marc, D., Brémond, A., et al.  
347 (2015). When the waves of European neolithization met: First paleogenetic evidence  
348 from early farmers in the Southern Paris Basin. *PLoS One* 10, 1–16.  
349 doi:10.1371/journal.pone.0125521.
- 350 Tamura, K., Peterson, D., Peterson, N., Stecher, G., Nei, M., and Kumar, S. (2011). MEGA5:  
351 Molecular evolutionary genetics analysis using maximum likelihood, evolutionary  
352 distance, and maximum parsimony methods. *Mol. Biol. Evol.* 28, 2731–2739.  
353 doi:10.1093/molbev/msr121.
- 354 Tresset, A., and Vigne, J.-D. (2007). “Substitution of species, techniques and symbols at the  
355 Mesolithic-Neolithic transition in Western Europe,” in *Going Over: The Mesolithic-  
356 Neolithic Transition in North-West Europe* (British Academy).  
357 doi:10.5871/bacad/9780197264140.003.0010.
- 358 Vidal, O., Drögemüller, C., Obexer-Ruff, G., Reber, I., Jordana, J., Martínez, A., et al. (2017).  
359 Differential distribution of Y-chromosome haplotypes in Swiss and Southern European  
360 goat breeds. *Sci. Rep.* 7, 1–6. doi:10.1038/s41598-017-15593-1.
- 361 Waki, A., Sasazaki, S., Kobayashi, E., and Mannen, H. (2015). Paternal phylogeography and  
362 genetic diversity of East Asian goats. *Anim. Genet.* 46, 337–339. doi:10.1111/age.12293.
- 363 Wallner, B., Palmieri, N., Vogl, C., Rigler, D., Bozlak, E., Druml, T., et al. (2017). Y  
364 Chromosome Uncovers the Recent Oriental Origin of Modern Stallions. *Curr. Biol.* 27,  
365 2029–2035.e5. doi:10.1016/j.cub.2017.05.086.
- 366 Wutke, S., Sandoval-Castellanos, E., Benecke, N., Döhle, H. J., Friederich, S., Gonzalez, J., et  
367 al. (2018). Decline of genetic diversity in ancient domestic stallions in Europe. *Sci. Adv.*  
368 4. doi:10.1126/sciadv.aap9691.
- 369 Xia, X., Yao, Y., Li, C., Zhang, F., Qu, K., Chen, H., et al. (2019). Genetic diversity of  
370 Chinese cattle revealed by Y-SNP and Y-STR markers. *Anim. Genet.* 50, 64–69.  
371 doi:10.1111/age.12742.
- 372 Zhang, M., Peng, W. F., Yang, G. L., Lv, F. H., Liu, M. J., Li, W. R., et al. (2014). Y  
373 chromosome haplotype diversity of domestic sheep (*Ovis aries*) in northern Eurasia.  
374 *Anim. Genet.* 45, 903–907. doi:10.1111/age.12214.
- 375 Zhang, Y., Lu, Y., Yindee, M., Li, K. Y., Kuo, H. Y., Ju, Y. Ten, et al. (2016). Strong and  
376 stable geographic differentiation of swamp buffalo maternal and paternal lineages  
377 indicates domestication in the China/Indochina border region. *Mol. Ecol.* 25, 1530–1550.  
378 doi:10.1111/mec.13518.
- 379 Zhao, W., Zhong, T., Wang, L. J., Li, L., and Zhang, H. P. (2014a). Extensive female-  
380 mediated gene flow and low phylogeography among seventeen goat breeds in southwest  
381 China. *Biochem. Genet.* 52, 355–364. doi:10.1007/s10528-014-9652-y.
- 382 Zhao, Y., Zhao, R., Zhao, Z., Xu, H., Zhao, E., and Zhang, J. (2014b). Genetic diversity and  
383 molecular phylogeography of Chinese domestic goats by large-scale mitochondrial DNA  
384 analysis. *Mol. Biol. Rep.* 41, 3695–3704. doi:10.1007/s11033-014-3234-2.  
385

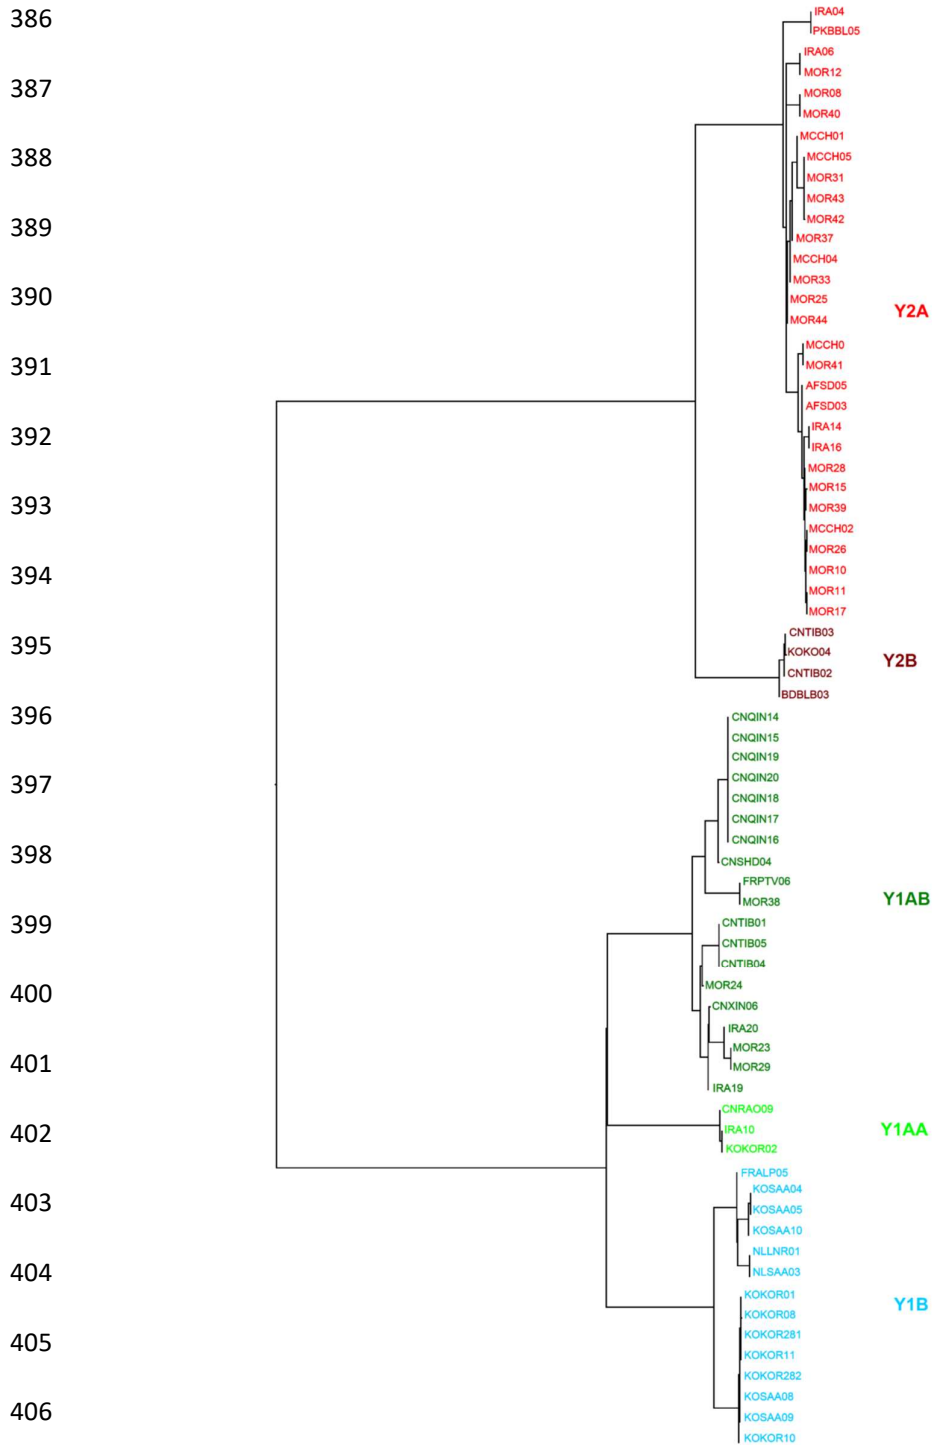

407 **Fig. 1.** Neighbor-joining tree of allele-sharing distances calculated on the basis of 2350  
408 hemizygous male-specific SNPs extracted from WGS of 70 male goats (Table 3) and the  
409 markhor sequence as an outgroup. AFSD, Sudan; BDBLB, Black Bengal; CNQIN, Qinghai;  
410 CNRAO, Henan Raoshan White; CNSHD, Shandong Yimeng Black; CNTIB, Tibetan;  
411 CNXIN, Xinjiang; FRALP, French Alpine; FRPTV, Poitou; IRA, Iran; KOKOR, Korea  
412 native; KOSAA, Korean Saanen; MOR, Morocco; NLLNR, Dutch Landrace; NLSAA, Dutch  
413 Saanen; PKBBL, Pakistan Beetal Black.

414

415 (A)

416

417

418

419

420

421

422

423

424

425

426

427

428

429

430

431

432

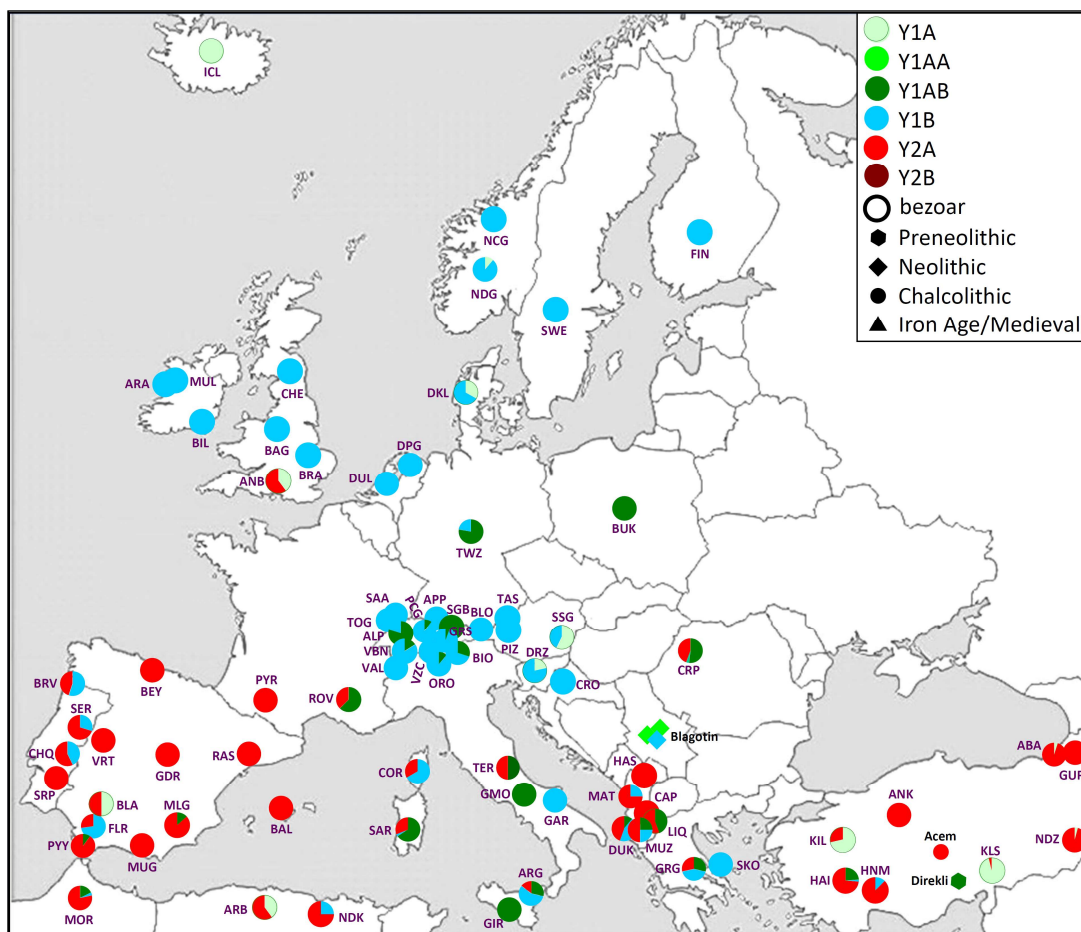

433 (B)

434

435

436

437

438

439

440

441

442

443

444

445

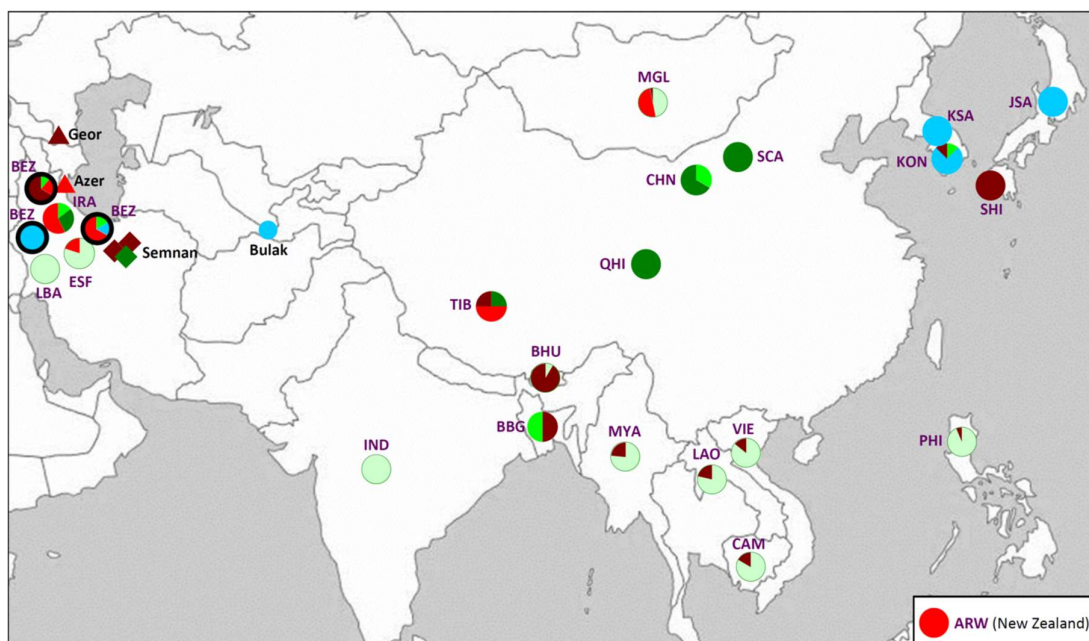

446 (C)

447

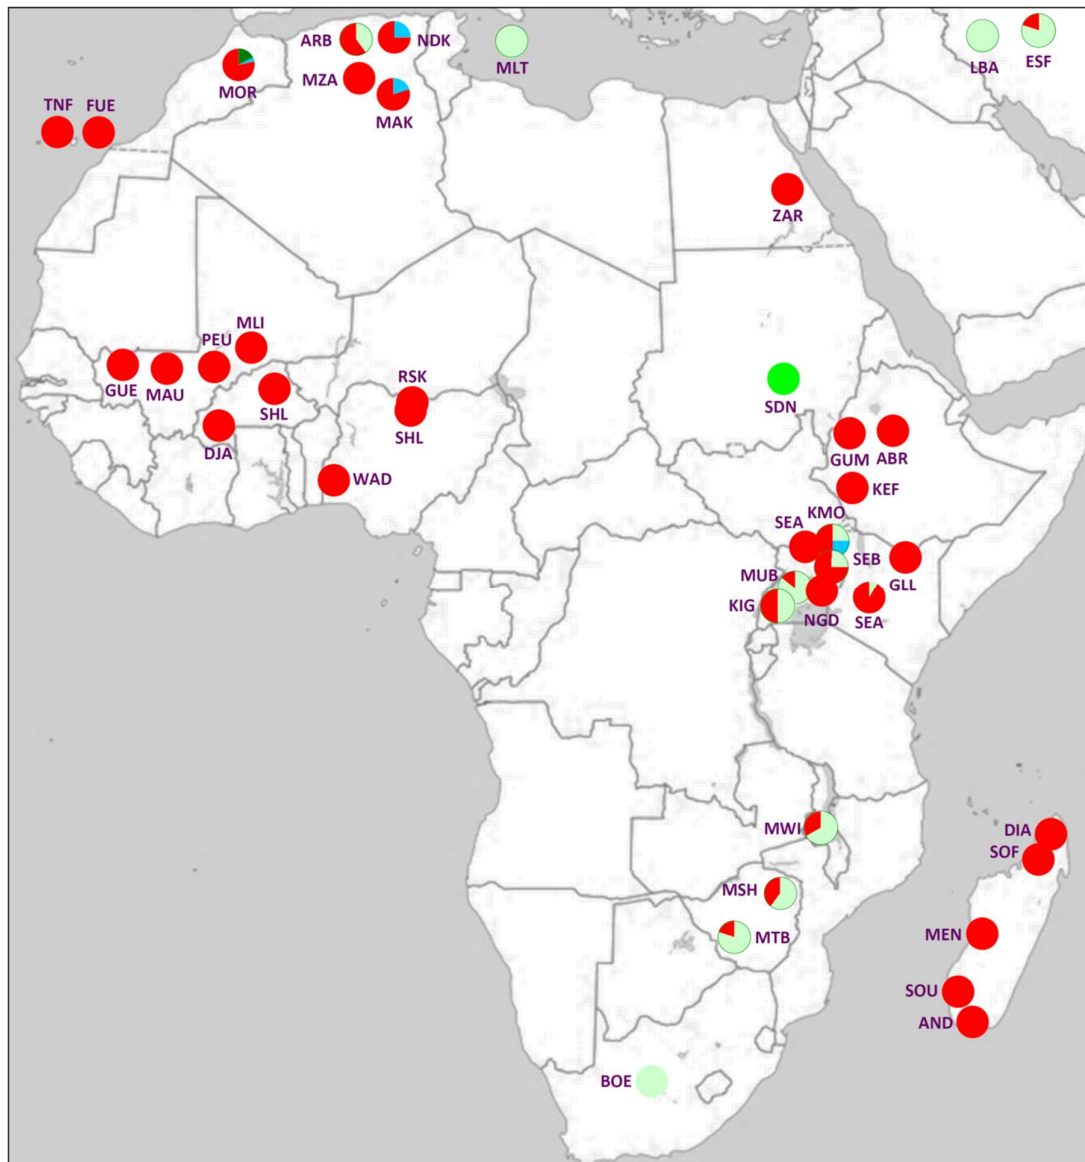

448 **Fig. 2.** Haplogroup distributions of **(A)** European breeds; **(B)** Asian breeds; **(C)** African  
449 breeds; **(A, B)**, European and Asian ancient DNA samples; and **(B)** Iranian bezoars. Breeds  
450 represented by a single goat are not plotted or are combined with other breeds from the same  
451 country as indicated in Table 4. Breed codes: ABA, Abaza; ALP, Alpine; ANB,  
452 AngloNubian; AND, Androy; ANK, Angora; Ankara; APP, Appenzell; ARA, Arabia; ARG,  
453 Argentata dell'Etna; ARR, Arran; ARW, Arapawa; BAG, Bagot; BAL, Balearic; BBG, Black  
454 Bengal; BEY, Bermeya; BHU, Bhutan; BIO, Bionda dell'Amadello; BLA, Blanca Andaluzza;  
455 BLB, Bilbery; BLO, Blobe; BOE, Boer; BRA, British Alpine; BRV, Bravia; BUK, Polish  
456 Fawn Colored; CAM, Cambodja; CAP, Capore; CHN, North China (Xinjiang, Henan  
457 Raoshan White, Shandong); CHQ, Charnequeira; CHV, Cheviot; COR, Corsican; CRO,  
458 Croatian Spotted; CRP, Carpathian; DIA, Diana; DJA, Djallonke; DKL, Danish Landrace;  
459 DPG, Dutch Pied Goat; DRZ, Dreznica; DUK, Dukati; DUL, Dutch Nordic Goat; ESF,  
460 Esfahan; ETH, Ethiopian (Abergelle, Gumez, Keffa); FIN, Finnish; FLR, Florida; FUE,  
461 Fuenteventura (Ajuy, Majorera); GAL, Galla; GAR, Garganica; GDR, Guadarrama; GGT,  
462 Girgentata; GMO, Grigia Molisana; GRG, Greek; GRS, Grisons Striped; GUE, Guéra; GUR,  
463 Gurcu; HAI, Hair; HAS, Hasi; HNM, Honamli; IND, Indian; IRA, Iranian; JPA, Shjiba; JSA,  
464 Japanese Saanen; KIG, Kigezi; KIL, Kil; KLS, Kilis; KMO, Karamonja; KON, Korean  
465 Native; KSA, Korean Saanen; LAO, Laos; LBA, Lori-Bakhtiari; ICL, Icelandic; LIQ,  
466 Liqenasi; MAK, Makatia; MAT, Mati; MAU, Maure; MEN, Menabe; MGL, Mongolian;  
467 MLG, Malagueña; MLI, Naine, Soudanaise Targui; MLT, Maltese; MLW, Malawi (Balaka-  
468 Ulonge, Dedza; Lilongwe; MOR, Moroccan; MSH, Mashona; MTB, Matebele; MUB,  
469 Mubende; MUG, Murciano Granadina; MUL, Mulranny; MUZ, Muzhake; MYA, Myanmar;  
470 MZA, M'Zabite; NCG, Norwegian Coastal; NDG, Norwegian Dairy; NDZ, Norduz; NGD,  
471 Nganda; NKA, Naine de Kabylie; ORO, Orobica; PCG, Peacock; PEU, Peulh; PHI,  
472 Philippines; PIZ, Pinzgauer; PYR, Pyrenean; PYY, Payoya; QHI, Qinhai; RAS, Rasquera;  
473 ROV, Rove; RSK, Nigerian Maradi (Red Sokoto); SAA, Saanen; SAR, Sarda; SCA, Shaanbe  
474 Cashmere; SDN, Sudan; SEA, Small East African (Kenya, Uganda); SEB, Sebei; SRP,  
475 Serpentina; SER, Serrana; SGB, St Gallen Booted; SHL, Shahel; SHL, Nigerian Sahel; SKO,  
476 Skopelos; SOF, Sofia; SOU, Southwest; SSG, Steirische Schecken; TAS, Tauernschecken;  
477 TER, Teramo; TIB, Tibetan; TNF, Tinerfena (Norte, Sud); TOG, Toggenburg; TWZ,  
478 Thuringian Forest; VAL, Valdostana; VBN, Valais Blackneck; VIE, Vietnam; VRT, Verata;  
479 VZC, Verzasca; WAD, West African Dwarf; ZAR, Zaraiba.

480



**Table 3.** Codes and SRA accession numbers of WGS data used for Fig. 1.

| <b>code [1]</b> | <b>our code</b> | <b>SRA accession</b> | <b>breed</b>          | <b>haplogroup</b> | <b>reference</b> |
|-----------------|-----------------|----------------------|-----------------------|-------------------|------------------|
| BDCH03          | BDBLB03         | SRX2982563           | Black Bengal          | Y2B               | [1]              |
| CNNCH04         | CNSHD04         | SRX2982510           | Shandong Yimeng black | Y1AB              | [1]              |
| CNNCH06         | CNXIN06         | SRX2982522           | Xinjiang              | Y1AB              | [1]              |
| CNNCH14         | CNQIN14         | SRX2982537           | Qinghai               | Y1AB              | [1]              |
| CNNCH15         | CNQIN15         | SRX2982502           | Qinghai               | Y1AB              | [1]              |
| CNNCH16         | CNQIN16         | SRX2982503           | Qinghai               | Y1AB              | [1]              |
| CNNCH17         | CNQIN17         | SRX2982504           | Qinghai               | Y1AB              | [1]              |
| CNNCH18         | CNQIN18         | SRX2982511           | Qinghai               | Y1AB              | [1]              |
| CNNCH19         | CNQIN19         | SRX2982507           | Qinghai               | Y1AB              | [1]              |
| CNNCH20         | CNQIN20         | SRX2982487           | Qinghai               | Y1AB              | [1]              |
| CNSCH09         | CNRAO09         | SRX2982486           | Raoshan Henan         | Y1AA              | [1]              |
| CNTCH01         | CNTIB01         | SRX2982520           | Tibetan               | Y1AB              | [1]              |
| CNTCH02         | CNTIB02         | SRX2982521           | Tibetan               | Y2B               | [1]              |
| CNTCH03         | CNTIB03         | SRX2982513           | Tibetan               | Y2B               | [1]              |
| CNTCH04         | CNTIB04         | SRX2982514           | Tibetan               | Y1AB              | [1]              |
| CNTCH05         | CNTIB05         | SRX2982515           | Tibetan               | Y1AB              | [1]              |
| FRCH06          | FRPTV06         | SRX2982542           | Poitou                | Y1AB              | [1]              |
| NLCH01          | NLLNR01         | SRX2982482           | Dutch Landrace        | Y1B               | [1]              |
| NLCH03          | NLDSA03         | SRX2982490:          | Dutch Saanen          | Y1B               | [1]              |
| PKCH05          | PKBBL05         | SRX2982568           | Beetal Black          | Y2A               | [1]              |
| SDCH03          | AFSD03          | SRX5417024           | Sudan                 | Y2A               | [1]              |
| SDCH05          | AFSD05          | SRX5417026           | Sudan                 | Y2A               | [1]              |
| FRCH05          | FRALP05         | SRX2982481           | Alpine                | Y1B               | [1]              |
|                 | KOSAA04         | ERX2360419           | Korean Saanen         | Y1B2              | [2]              |
|                 | KOSAA05         | ERX2360420           | Korean Saanen         | Y1B2              | [2]              |
|                 | KOSAA08         | ERX2360423           | Korean Saanen         | Y1B               | [2]              |
|                 | KOSAA09         | ERX2360424           | Korean Saanen         | Y1B               | [2]              |
|                 | KOSAA10         | ERX2360425           | Korean Saanen         | Y1B2              | [2]              |
|                 | KOKOR01         | ERX2360430           | Korean Saanen         | Y1B               | [2]              |
|                 | KOKOR02         | ERX2360431           | Korean Saanen         | Y1AA              | [2]              |
|                 | KOKOR08         | ERX2360437           | Korean Saanen         | Y1B               | [2]              |
|                 | KOKOR10         | ERX2360439           | Korean Saanen         | Y1B               | [2]              |
|                 | KOKOR11         | ERX2360440           | Korean Saanen         | Y1B               | [2]              |
|                 | KOKOR281        | ERX2360442           | Korean Saanen         | Y1B               | [2]              |
|                 | KOKOR282        | ERX2360443           | Korean Saanen         | Y1B               | [2]              |
|                 | KOKOR04         | ERX2360445           | Korean Saanen         | Y2B               | [2]              |
| IRCH04          | IRA04           | ERX286352            | Iran                  | Y2A               | [3]              |
| IRCH06          | IRA06           | ERX286345            | Iran                  | Y2A               | [3]              |
| IRCH10          | IRA10           | ERX286355            | Iran                  | Y1AA              | [3]              |
| IRCH14          | IRA14           | ERX286363            | Iran                  | Y2A               | [3]              |
| IRCH16          | IRA16           | ERX286347            | Iran                  | Y2A               | [3]              |
| IRCH19          | IRA19           | ERX313213            | Iran                  | Y1AB              | [3]              |
| IRCH20          | IRA20           | ERX313216            | Iran                  | Y1AB              | [3]              |

|        |       |           |          |      |     |
|--------|-------|-----------|----------|------|-----|
| MCCH01 | MOR01 | ERX194212 | Moroccan | Y2A  | [3] |
| MCCH02 | MOR02 | ERX194211 | Moroccan | Y2A  | [3] |
| MCCH03 | MOR03 | ERX204035 | Moroccan | Y2A  | [3] |
| MCCH04 | MOR04 | ERX204033 | Moroccan | Y2A  | [3] |
| MCCH05 | MOR05 | ERX204019 | Moroccan | Y2A  | [3] |
| MCCH08 | MOR08 | ERX204026 | Moroccan | Y2A  | [3] |
| MCCH10 | MOR10 | ERX204034 | Moroccan | Y2A  | [3] |
| MCCH11 | MOR11 | ERX204027 | Moroccan | Y2A  | [3] |
| MCCH12 | MOR12 | ERX207043 | Moroccan | Y2A  | [3] |
| MCCH15 | MOR15 | ERX208812 | Moroccan | Y2A  | [3] |
| MCCH17 | MOR17 | ERX220684 | Moroccan | Y2A  | [3] |
| MCCH23 | MOR23 | ERX272615 | Moroccan | Y1AB | [3] |
| MCCH24 | MOR24 | ERX286410 | Moroccan | Y1AB | [3] |
| MCCH25 | MOR25 | ERX286408 | Moroccan | Y2A  | [3] |
| MCCH26 | MOR26 | ERX286419 | Moroccan | Y2A  | [3] |
| MCCH28 | MOR28 | ERX286420 | Moroccan | Y2A  | [3] |
| MCCH29 | MOR29 | ERX286403 | Moroccan | Y1AB | [3] |
| MCCH31 | MOR31 | ERX288658 | Moroccan | Y2A  | [3] |
| MCCH33 | MOR33 | ERX288657 | Moroccan | Y2A  | [3] |
| MCCH37 | MOR37 | ERX288652 | Moroccan | Y2A  | [3] |
| MCCH38 | MOR38 | ERX288656 | Moroccan | Y1AB | [3] |
| MCCH39 | MOR39 | ERX288926 | Moroccan | Y2A  | [3] |
| MCCH40 | MOR40 | ERX291909 | Moroccan | Y2A  | [3] |
| MCCH41 | MOR41 | ERX306478 | Moroccan | Y2A  | [3] |
| MCCH42 | MOR42 | ERX306471 | Moroccan | Y2A  | [3] |
| MCCH43 | MOR43 | ERX313276 | Moroccan | Y2A  | [3] |
| MCCH44 | MOR44 | ERX286409 | Moroccan | Y2A  | [3] |

[1] Z. Zheng & Y. Jiang, unpublished

[2] Kim et al. (2019) doi: 10.3389/fgene.2019.00699

[3] Alberto et al. (2018) doi: 10.1038/s41467-018-03206-y

**Table 4.** Haplogroup distributions in breeds or populations, in ancient DNA and in the bezoar. Kasp, Kasp (Kompetitive allele specific PCR assay); ddSeq, dideoxy sequencing. Codes starting with ERX or SRX codes are from the Short Reads Archive

|               | Breed subpopulation  | Method, ref., SRA code                                      | code | N  | Y1A  |      |     |     |     |
|---------------|----------------------|-------------------------------------------------------------|------|----|------|------|-----|-----|-----|
|               |                      |                                                             |      |    | Y1AA | Y1AB | Y1B | Y2A | Y2B |
| <b>Europe</b> |                      |                                                             |      |    |      |      |     |     |     |
| Albania       | Capore               | ddSeq                                                       | CAP  | 9  |      |      |     | 9   |     |
|               | Dukati               | ddSeq                                                       | DUK  | 9  |      | 1    | 4   | 4   |     |
|               | Hasi                 | ddSeq                                                       | HAS  | 7  |      |      |     | 7   |     |
|               | Liqenasi             | ddSeq                                                       | LIQ  | 9  |      | 4    |     | 5   |     |
|               | Muzhake              | ddSeq                                                       | MUZ  | 8  |      | 2    | 2   | 4   |     |
|               | Mati                 | ddSeq                                                       | MAT  | 8  |      |      | 2   | 6   |     |
| Alp region    | Alpine               |                                                             |      |    |      |      |     |     |     |
|               | Switzerland          | ddSeq                                                       |      |    |      | 12   | 3   |     |     |
|               | Switzerland          | Vidal                                                       |      |    |      | 14   | 2   |     |     |
|               | Germany              | ddSeq                                                       |      |    |      | 4    | 5   |     |     |
|               | France               | ddSeq                                                       |      |    |      | 2    | 2   |     |     |
|               | Italy                | ddSeq                                                       |      |    |      | 10   |     |     |     |
|               | Austria              | Kasp                                                        |      |    |      | 5    |     |     |     |
|               | Combined             |                                                             | ALP  | 59 |      | 47   | 12  |     |     |
| Austria       | Blobe                | Kasp                                                        | BLO  | 7  |      |      | 6   |     |     |
|               | Pinzgauer            | ddSeq                                                       | PIZ  | 6  |      |      | 6   |     |     |
|               | Steirische Schecken  | Kasp                                                        | SSG  | 7  | 4    |      | 3   |     |     |
|               | Tauernschecken       | ddSeq                                                       | TAS  | 6  |      |      | 6   |     |     |
| Croatia       | Croatian Spotted     | Kasp                                                        | CRO  | 5  |      |      | 5   |     |     |
|               | Istrian              | Kasp                                                        | IST  | 1  |      |      | 1   |     |     |
| Denmark       | Danish Landrace      | Kasp                                                        | DKL  | 3  | 1    |      | 2   |     |     |
| England       | Bagot                | Kasp                                                        | BAG  | 4  |      |      | 4   |     |     |
|               | British Alpine       | ERX2360400, ERX2360402                                      | BRA  | 2  |      |      | 2   |     |     |
|               | Cheviot              | Kasp                                                        | CHV  | 7  |      |      | 7   |     |     |
|               | AngloNubian          |                                                             |      |    |      |      |     |     |     |
|               | China                | SRX5042650, SRX5042648, SRX5042661, SRX5042659 <sup>1</sup> |      | 2  |      |      | 2   |     |     |
|               | Australia            | ERX2360407 <sup>2</sup>                                     |      |    |      |      | 1   |     |     |
|               | Combined             |                                                             | ANB  | 5  | 2    |      |     | 3   |     |
| Finland       | Finnish              | Kasp                                                        | FIN  | 3  |      |      | 3   |     |     |
| France        | Corsican             | ddSeq                                                       | COR  | 9  |      |      | 6   | 3   |     |
|               | Pyrenean             | ddSeq                                                       | PYR  | 5  |      |      | 5   |     |     |
|               | Rove                 | ddSeq                                                       | ROV  | 8  | 5    |      | 3   |     |     |
| Germany       | Thuringian Forest    | ddSeq                                                       | TWZ  | 9  |      | 7    | 2   |     |     |
| Greece        | Greek                | ddSeq                                                       | GRG  | 7  |      | 2    | 3   | 2   |     |
|               | Skopelos             | ddSeq                                                       | SKO  | 9  |      |      | 9   |     |     |
| Iceland       | Icelandic Goat       | Kasp                                                        | ICL  | 4  | 4    |      |     |     |     |
| Ireland       | Arran                | Kasp                                                        | ARR  | 4  |      |      | 4   |     |     |
|               | Bilbery              | Kasp                                                        | BLB  | 4  |      |      | 4   |     |     |
|               | Mulranny             | Kasp                                                        | MUL  | 11 |      |      | 11  |     |     |
| Italy         | Argentata dell'Etna  | ddSeq                                                       | ARG  | 7  |      | 2    | 4   | 1   |     |
|               | Bionda dell'Amadello | ddSeq-, Kasp                                                | BIO  | 10 |      | 3    | 7   |     |     |
|               | Garganica            | Vidal et al. 2017 <sup>4</sup>                              | GAR  | 3  |      |      | 3   |     |     |
|               | Girgentata           | ddSeq                                                       | GGT  | 10 | 10   |      |     |     |     |
|               | Grigia Molisana      | ddSeq                                                       | GMO  | 2  |      | 2    |     |     |     |
|               | Orobica              | ddSeq                                                       | ORO  | 9  |      | 1    | 8   |     |     |
|               | Sarda                | ddSeq                                                       |      |    | 5    |      | 4   |     |     |
|               |                      | Kasp                                                        |      |    |      |      | 1   |     |     |
|               |                      | Vidal et al. 2017 <sup>4,5</sup>                            |      |    | 16   | 1    | 5   |     |     |
|               | Combined             |                                                             | SAR  | 32 |      | 21   | 1   | 10  |     |
|               | Teramo               | Kasp                                                        | TER  | 2  |      |      | 1   | 1   |     |
|               | Valdostana           | ddSeq                                                       | VAL  | 9  |      |      | 9   |     |     |
| Malta         | Maltese              | Vidal et al. 2017 <sup>4</sup>                              | MLT  | 3  |      | 3    |     |     |     |

|                                              |                              |                                                       |                                                     |     |    |          |              |               |    |    |
|----------------------------------------------|------------------------------|-------------------------------------------------------|-----------------------------------------------------|-----|----|----------|--------------|---------------|----|----|
| Netherlands                                  | Dutch Nordic Goat            | Kasp<br>SRX2982490 <sup>3</sup><br>Combined           | DUL                                                 | 21  |    | 20<br>1  |              |               |    |    |
|                                              | Dutch Pied Goat              | Kasp                                                  | DPG                                                 | 5   |    |          | 21<br>5      |               |    |    |
|                                              | Dutch Saanen                 | SRX2982490 <sup>3</sup>                               | DSA                                                 | 1   |    |          | 1            |               |    |    |
| Norway                                       | Norwegian Dairy              | Kasp                                                  | NDG                                                 | 9   | 1  |          | 8            |               |    |    |
|                                              | Norwegian Coastal            | Kasp                                                  | NCG                                                 | 6   |    |          | 6            |               |    |    |
| Poland                                       | Polish Fawn Colored          | ddSeq                                                 | BUK                                                 | 7   |    | 7        |              |               |    |    |
| Portugal                                     | Algarve                      | Pereira et al. 2009 <sup>6</sup>                      | ALG                                                 | 1   |    |          |              |               | 1  |    |
|                                              | Bravia                       | Pereira et al. 2009 <sup>6</sup><br>ddSeq<br>Combined |                                                     |     |    |          | 8<br>3<br>11 | 6<br>3<br>9   |    |    |
|                                              |                              | Charnequeira                                          | Pereira et al. 2009 <sup>6</sup>                    | CHQ | 8  |          |              | 3             | 4  |    |
|                                              |                              | Serpentina                                            | Pereira et al. 2009 <sup>6</sup>                    | SRP | 7  |          |              | 7             |    |    |
|                                              | Serrana                      | Pereira et al. 2009 <sup>6</sup>                      | SER                                                 | 14  |    |          | 14           | 33            |    |    |
|                                              | Romania                      | Carpathian                                            | ddSeq                                               |     |    |          | 4            |               | 4  |    |
| Vidal et al. 2017 <sup>4,5</sup><br>Combined |                              |                                                       | CRP                                                 | 27  |    | 10<br>14 | 1<br>1       | 8<br>12       |    |    |
|                                              |                              |                                                       | DRZ                                                 | 14  | 3  |          |              | 11            |    |    |
| Spain                                        | Balearic                     | Vidal et al. 2017 <sup>4</sup>                        | BAL                                                 | 25  |    |          |              |               | 25 |    |
|                                              | Bermeya                      | Vidal et al. 2017 <sup>4</sup>                        | BEY                                                 | 9   |    |          |              |               | 9  |    |
|                                              | Blanca Andaluzza             | Vidal et al. 2017 <sup>4</sup>                        | BLA                                                 | 2   | 1  |          |              |               | 1  |    |
|                                              | Florida                      | ddSeq, Kasp                                           | FLR                                                 | 11  |    |          | 8            |               | 3  |    |
|                                              | Guadarrama                   | ddSeq<br>Vidal et al. 2017 <sup>4</sup><br>Combined   | GDR                                                 | 17  |    |          |              | 7<br>10<br>17 |    |    |
|                                              |                              | Malagueña                                             | ddSeq<br>Vidal et al. 2017 <sup>4</sup><br>Combined | MLG | 15 | 2        |              |               | 4  | 13 |
|                                              |                              | Murciano Granadina                                    | Vidal et al. 2017 <sup>4</sup>                      | MUG | 23 |          |              |               |    | 23 |
|                                              | Payoya                       | ddSeq                                                 | PYY                                                 | 10  |    | 1        |              |               | 9  |    |
|                                              | Rasquera                     | Vidal et al. 2017 <sup>4</sup>                        | RAS                                                 | 5   |    |          |              |               | 5  |    |
|                                              | Verata                       | ddSeq                                                 | VRT                                                 | 11  |    |          |              |               | 11 |    |
| Switzerland                                  | Appenzell<br>Grisons Striped | Vidal et al. 2017 <sup>4</sup><br>ddSeq               | APP                                                 | 8   |    |          | 8            |               |    |    |
|                                              |                              | Vidal et al. 2017 <sup>4</sup><br>Combined            | GRS                                                 | 18  |    | 1        | 8<br>9<br>17 |               |    |    |
|                                              |                              | Peacock                                               | ddSeq                                               |     |    | 2        |              | 9             |    |    |
|                                              | Saanen                       | Vidal et al. 2017 <sup>4</sup><br>Combined            | PCG                                                 | 20  |    |          | 2            | 18            |    |    |
|                                              |                              | St Gallen Booted                                      | ddSeq                                               |     |    | 12       |              | 18            |    |    |
|                                              | Toggenburg                   | Vidal et al. 2017 <sup>4,5</sup><br>Combined          | SGB                                                 | 21  |    | 9        | 21           |               |    |    |
|                                              |                              | Valais Blackneck                                      | ddSeq                                               |     |    | 4        |              | 12            | 8  |    |
|                                              | Verzasca                     | Vidal et al. 2017 <sup>4</sup><br>Combined            | VBN                                                 | 25  |    |          | 4            | 9<br>21       |    |    |
|                                              |                              | Vidal et al. 2017 <sup>4</sup>                        | VZC                                                 | 8   |    |          |              | 8             |    |    |
|                                              | <b>Asia</b>                  |                                                       |                                                     |     |    |          |              |               |    |    |
| Southeast Asia                               | Cambodja                     | Waki et al., 2015                                     | CAM                                                 | 36  | 30 |          |              |               | 6  |    |
|                                              | Myanmar                      | Waki et al., 2015                                     | MYA                                                 | 34  | 26 |          |              |               | 8  |    |
|                                              | Laos                         | Waki et al., 2015                                     | LAO                                                 | 14  | 11 |          |              |               | 3  |    |
|                                              | Vietnam                      | Waki et al., 2015                                     | VIE                                                 | 7   | 6  |          |              |               | 1  |    |
|                                              | Philippines                  | Waki et al., 2015                                     | PHI                                                 | 16  | 15 |          |              |               | 1  |    |
|                                              | Indian                       | Waki et al., 2015                                     | IND                                                 | 7   | 7  |          |              |               | 0  |    |
|                                              | Bhutan                       | Waki et al., 2015                                     | BHU                                                 | 24  | 2  |          |              |               | 22 |    |
| Mongolia                                     | Mongolian                    | Waki et al., 2015                                     | MGL                                                 | 32  | 15 |          |              | 16            | 1  |    |

|               |                                                                                                                                  |                                                                                                                                                                                                                                                                                                                                                                                                                                                                                    |                                                                          |                                                                  |  |                                                                      |   |    |  |                                                                                                  |
|---------------|----------------------------------------------------------------------------------------------------------------------------------|------------------------------------------------------------------------------------------------------------------------------------------------------------------------------------------------------------------------------------------------------------------------------------------------------------------------------------------------------------------------------------------------------------------------------------------------------------------------------------|--------------------------------------------------------------------------|------------------------------------------------------------------|--|----------------------------------------------------------------------|---|----|--|--------------------------------------------------------------------------------------------------|
| Japan         | Shjiba<br>Saanen                                                                                                                 | Waki et al., 2015<br>Waki et al., 2015                                                                                                                                                                                                                                                                                                                                                                                                                                             | JPA<br>JSA                                                               | 11<br>30                                                         |  |                                                                      |   | 30 |  | 11                                                                                               |
| China         | Qinhai<br><br>Tibetan<br><br>Shaanbei Cashmere<br><br>North China<br><br>Xinjiang<br>Henan Raoshan White<br>Shandong<br>Combined | SRX2982487, SRX2982502,<br>SRX2982503, SRX2982504,<br>SRX2982507, SRX2982511,<br>SRX2982537 <sup>3</sup><br>SRX1011417, SRX1011436,<br>SRX1011437, SRX1011440,<br>SRX1011441, SRX1011443,<br>SRX1011672 <sup>7</sup><br>SRX2982520, SRX2982521,<br>SRX2982513, SRX2982514,<br>SRX2982515 <sup>3</sup><br>Combined<br>SRX3472906, SRX3472909,<br>SRX3472910, SRX3472913,<br>SRX3472914<br>SRX2982522 <sup>3</sup><br>SRX2982486 <sup>3</sup><br>SRX2982510 <sup>3</sup><br>Combined | QHI<br><br><br><br>TIB<br>NCA<br><br><br>CHN                             | 7<br><br><br><br>12<br>5<br><br><br>1<br><br>3<br><br>1<br><br>3 |  | 7<br><br><br><br>1<br><br>3<br><br>1<br><br>1<br><br>1               |   |    |  | 6<br><br>2<br><br>4<br><br>4                                                                     |
| Bangladesh    | Black Bengal                                                                                                                     | SRX5002284, SRX5057038,<br>SRX5058418 <sup>8</sup><br>SRX2982563 <sup>3</sup><br>Combined                                                                                                                                                                                                                                                                                                                                                                                          | BBG                                                                      | 4                                                                |  | 2<br>2                                                               |   |    |  | 1<br>1<br>2                                                                                      |
| Iran          | Iran<br>Lori-Bakhtiari<br>Esfahan                                                                                                | SRA (see Table 2)                                                                                                                                                                                                                                                                                                                                                                                                                                                                  | IRA<br>LBA<br>ESF                                                        | 7<br>10<br>10                                                    |  | 1<br>10<br>8                                                         | 2 |    |  | 4<br>2                                                                                           |
| Pakistan      | Beetal Black Pakistan                                                                                                            | SRX2982568 <sup>3</sup>                                                                                                                                                                                                                                                                                                                                                                                                                                                            | BBL                                                                      | 1                                                                |  |                                                                      |   |    |  | 1                                                                                                |
| South Korea   | Korean Native<br><br>Korean Saanen                                                                                               | ERX2360430, ERX2360431,<br>ERX2360437, ERX2360439,<br>ERX2360440, ERX2360442,<br>ERX2360443, ERX2360445 <sup>2</sup><br>ERX2360419, ERX2360420,<br>ERX2360423, ERX2360424,<br>ERX2360425 <sup>2</sup>                                                                                                                                                                                                                                                                              | KON<br><br>KSA                                                           | 8<br><br>5                                                       |  | 1                                                                    |   | 6  |  | 1<br><br>5                                                                                       |
| Turkey        | Abaza<br><br>Angora<br><br>Gurcu<br><br>Hair<br><br>Honamli<br>Kil<br>Kilis<br><br>Norduz                                        | ddSeq<br>Cinar-Kul et al., 2015 <sup>9</sup><br>Combined<br>Cinar-Kul et al., 2015 <sup>9</sup><br>Turkey<br>Turkey ddSeq<br>Turkey Kasp<br>Combined<br>ddSeq<br>Cinar-Kul et al., 2015 <sup>9</sup><br>Combined<br>Cinar-Kul et al., 2015 <sup>1,9</sup><br>ddSeq<br>Combined<br>Cinar-Kul et al., 2015 <sup>9</sup><br>Cinar-Kul et al., 2015 <sup>9</sup><br>Cinar-Kul et al., 2015 <sup>9</sup><br>Kasp<br>Combined<br>Combined                                                | ABA<br><br><br>ANK<br><br>GUR<br><br>HAI<br>HNM<br>KIL<br><br>KLS<br>NDZ | 1<br>21<br><br>47<br>21<br><br>42<br>24<br>7<br>24<br>27<br>24   |  | 1<br>1<br><br>6<br>4<br><br>10<br><br>6<br>4<br><br>5<br><br>26<br>1 |   |    |  | 9<br>11<br>20<br><br>31<br>6<br>10<br>47<br>9<br>12<br>21<br>29<br>2<br>31<br>21<br>2<br>1<br>23 |
| <b>Africa</b> |                                                                                                                                  |                                                                                                                                                                                                                                                                                                                                                                                                                                                                                    |                                                                          |                                                                  |  |                                                                      |   |    |  |                                                                                                  |
| Algeria       | Arabia                                                                                                                           | Kasp                                                                                                                                                                                                                                                                                                                                                                                                                                                                               | ARA                                                                      | 5                                                                |  | 2                                                                    |   |    |  | 3                                                                                                |



|                                                       |                              |                                         |     |             |   |    |   |    |
|-------------------------------------------------------|------------------------------|-----------------------------------------|-----|-------------|---|----|---|----|
|                                                       | Makatia                      | Kasp                                    | MAK | 5           |   |    | 1 | 4  |
|                                                       | M'Zabite                     | Kasp                                    | MZA | 5           |   |    |   | 5  |
|                                                       | Naine de Kabylie             | Kasp                                    | NKA | 4           |   |    | 1 | 3  |
| Burkina Fasso                                         | Djallonke                    | Vidal et al. 2017                       | DJA | 5           |   |    |   | 5  |
|                                                       | Shahel                       | Vidal et al. 2017                       | SHL | 9           |   |    |   | 9  |
| Canadian Isles                                        | Fuenteventura                | Kasp                                    |     |             |   |    |   |    |
|                                                       | Ajuy                         |                                         |     |             |   |    |   | 8  |
|                                                       | Majorera                     |                                         |     |             |   |    |   | 11 |
|                                                       | Combined                     |                                         | FUE | 19          |   |    |   | 19 |
|                                                       | Tinerfena                    | Kasp                                    |     |             |   |    |   |    |
|                                                       | Norte                        |                                         |     |             |   |    |   | 7  |
|                                                       | Sud                          |                                         |     |             |   |    |   | 8  |
|                                                       | Combined                     |                                         | TNF | 15          |   |    |   | 15 |
| Egypt                                                 | Zaraiba                      | Vidal et al. 2017 <sup>4</sup>          | ZAR | 15          |   |    |   | 15 |
| Ethiopia                                              | Ethiopian                    | Kasp                                    |     |             |   |    |   |    |
|                                                       | Abergelle                    |                                         |     |             |   |    |   | 10 |
|                                                       | Gumez                        |                                         |     |             |   |    |   | 1  |
|                                                       | Keffa                        |                                         |     |             |   |    |   | 1  |
|                                                       | Combined                     |                                         | ETH | 12          |   |    |   | 12 |
| Kenya                                                 | Galla                        | Kasp                                    | GAL | 9           |   |    |   | 9  |
| Kenya, Uganda                                         | Small East African           | Kasp                                    | SEA | 12          | 1 |    |   | 11 |
| Madagascar                                            | Androy                       | Kasp                                    | AND | 3           |   |    |   | 3  |
|                                                       | Diana                        | Kasp                                    | DIA | 6           |   |    |   | 6  |
|                                                       | Menabe                       | Kasp                                    | MEN | 3           |   |    |   | 3  |
|                                                       | Sofia                        | Kasp                                    | SOF | 6           |   |    |   | 6  |
|                                                       | Southwest                    | Kasp                                    | SOU | 6           |   |    |   | 6  |
| Mali                                                  | Guéra                        | Kasp                                    | GUE | 5           |   |    |   | 5  |
|                                                       | Maure                        |                                         | MAU | 4           |   |    |   | 4  |
|                                                       | Naine+Soudanaise+Targui      |                                         | MLI | 4           |   |    |   | 4  |
|                                                       | Peulh                        |                                         | PEU | 5           |   |    |   | 5  |
| Malawi                                                | Malawi                       | Kasp                                    |     |             |   | 1  |   |    |
|                                                       | Balaka-Ulonge                |                                         |     |             |   | 1  |   |    |
|                                                       | Dedza                        |                                         |     |             |   | 1  |   |    |
|                                                       | Lilongwe                     |                                         |     |             |   | 1  |   | 1  |
|                                                       | Combined                     |                                         | MLW | 3           | 2 |    |   | 1  |
| Morocco                                               |                              | SRA (see Table 2)                       |     |             |   | 4  |   | 23 |
|                                                       |                              | Pereira et al. 2009 <sup>6</sup> , Kasp |     |             |   | 9  | 2 | 35 |
|                                                       |                              | Combined                                | MOR | 73          |   | 13 | 2 | 58 |
| Nigeria                                               | Nigerian Maradi (Red Sokoto) | Kasp                                    | RSK | 11          |   |    |   | 11 |
| Nigeria                                               | Nigerian Sahel               | Kasp                                    | SHL | 12          |   |    |   | 12 |
| Nigeria                                               | West African Dwarf           | Vidal et al. 2017 <sup>4</sup>          |     |             |   |    |   | 2  |
|                                                       |                              | Kasp                                    |     |             |   |    |   | 13 |
|                                                       |                              | Combined                                | WAD | 15          |   |    |   | 15 |
| South Africa                                          | Boer                         | Kasp, Var                               |     |             |   | 5  |   |    |
|                                                       | Zimbabwe                     |                                         |     |             |   | 2  |   |    |
|                                                       | Uganda                       |                                         | BOE | 7           | 7 |    |   |    |
| Sudan                                                 | Sudan                        | SRX5417025, SRX5417026                  | SDN | 2           |   |    |   | 2  |
| Uganda                                                | Karamonja                    | Kasp                                    | KMO | 4           | 1 |    | 1 | 2  |
|                                                       | Kigezi                       | Kasp                                    | KIG | 2           | 1 |    |   | 1  |
|                                                       | Mubende                      | Kasp                                    | MUB | 7           | 6 |    |   | 1  |
|                                                       | Nganda                       | Kasp                                    | NGD | 2           | 1 |    |   | 2  |
|                                                       | Sebei                        | Kasp                                    | SEB | 4           | 1 |    |   | 3  |
| Zimbabwe                                              | Mashona                      | Kasp                                    | MSH | 6           | 4 |    |   | 2  |
|                                                       | Matebele                     | Kasp                                    | MTB | 10          | 8 |    |   | 2  |
| <b>New World</b>                                      |                              |                                         |     |             |   |    |   |    |
| New Zealand                                           | Arapawa                      | Kasp                                    | ARW | 7           |   |    |   | 7  |
| <b>all 132 extant domestic breeds or populations:</b> |                              |                                         |     | <b>1534</b> |   |    |   |    |
| <b>Ancient DNA</b>                                    |                              | Daly et al. 2019 <sup>10</sup>          |     |             |   |    |   |    |
| Turkey                                                | Direkli 9500 BCE             |                                         |     | 1           |   | 1  |   |    |
| Serbia                                                | Blagotin 6100 BCE            |                                         |     | 3           | 2 |    | 1 |    |

|                      |                         |     |  |           |   |   |   |   |   |
|----------------------|-------------------------|-----|--|-----------|---|---|---|---|---|
| Iran                 | Semnan 6000 BCE         |     |  | 3         |   | 1 |   |   | 2 |
| Uzbekistan           | Bulak 1850 BCE          |     |  | 1         |   | 1 |   |   |   |
| Turkey               | Acem 1700 BC            |     |  |           |   |   |   | 1 |   |
| Azerbaijan           | Azer 440 BCE            |     |  | 1         |   |   |   | 1 |   |
| Georgia              | Geor 1000-1500          |     |  | 1         |   |   |   |   | 1 |
| <b>all ancient</b>   |                         |     |  | <b>10</b> |   |   |   |   |   |
| <b>Wild ancestor</b> | Cumer, T., unpublished. |     |  |           |   |   |   |   |   |
|                      | Bezoar                  |     |  |           |   |   |   |   |   |
|                      | North Iran              |     |  | 1         |   |   |   | 2 | 6 |
|                      | Central Iran            |     |  |           |   | 5 |   |   |   |
|                      | Iran, Caspian           |     |  | 1         |   | 1 |   | 4 |   |
|                      | Combined                | BEZ |  | <b>20</b> | 2 |   | 6 | 6 | 6 |

<sup>1</sup> Cao et al., 2019, doi.org/10.3389/fgene.2019.00145

<sup>2</sup> Kim et al., 2019, doi.org/10.3389/fgene.2019.00699

<sup>3</sup> Zheng & Jiang, unpublished

<sup>4</sup> Vidal et al., 2017, doi.org/10.1038/s41598-017-15593-1

<sup>5</sup> The absence of Y1AA in this breed has been inferred from dideoxy sequencing and/or WGS data for samples from the same breed

<sup>6</sup> Pereira et al., doi.org/10.1093/molbev/msp200

<sup>7</sup> Wu et al., 2019, doi.org/10.1101/743955

<sup>8</sup> Siddiki et al., 2019, doi.org/10.1186/s13104-019-4400-3

<sup>9</sup> Cinar-Kul, 2015, doi.org/10.1111/jbg.12154

<sup>10</sup> Daly et al., 2018, doi.org/10.1126/science.aas9411

**Table 5.** Primers for amplification and dideoxy sequencing of DBY, SRY and ZFY fragments and genomic coordinates of sequence covered by the sequence reads excluding the primer sequences.

| Primer | Primary PCR             | Nested PCR with M13 tags      | Coverage                       |
|--------|-------------------------|-------------------------------|--------------------------------|
| M13F   |                         | TGTAAAACGACGGCCAGT            |                                |
| M13R   |                         | AGGAAACAGCTATGACCAT           |                                |
| DBY1F  | AGCAGTTTGGRTCTCGWGA     | M13F-GTGTGTATAATATAGSATTTTCAG | NW_017189685.1:                |
| DBY1R  | CCAACGACTATGWCCACT      | M13R-GTAACCTTCAAAGATGCTAGT    | 43044-43499                    |
| SRY2F  | GACTGAGTGACTAAACTGAACTG | M13F-TAAAGGTTCTTATCTTCCC      |                                |
| SRY2R  | TATACTGAGCCACTTCAAAGCA  | M13R-TGGAGAAAATTGAAAAGTAAGG   |                                |
| SRY3F  | AGCCTTTGAAGTTTCTACTGTC  | M13F-ACAATATACAGTTATTACTCCCA  |                                |
| SRY3R  | CCCAATACCTCCCCTCAATAC   | M13R-CAGAATTTGTGAAGGCGC       |                                |
| SRY4F  | GTCTGCTGCACCTTCATC      | M13F-AAATAACTTCACAATGACACCT   | NW_017189563.1:                |
| SRY4R  | CTTATTGTGGCCAGGCTTGTC   | M13R-TGTGAGCGGCTTAATTGGCTT    | 277335-278711;                 |
| SRY5F  | CCGGGCTATAAATATCGACCTC  | M13F-CCACAGAAATCGCTTGATGC     | 278905-280806                  |
| SRY3R  | GATGAAACCTTGGGTCTCACAG  | M13R-CAGAATTTGTGAAGGCGC       |                                |
| SRY6F  | CTCACAAATTCATGGTACAGAG  | M13F-GAAAAACCTCGTACTTGGA      |                                |
| SRY6R  | GATCTTGTTTATCCCATCCC    | M13R-GCCACATAGTCTGAATAGG      |                                |
| ZFY1F  | CAGGTGAGGGCACATGAG      | M13F-GCTCTCAGAAGAAATTCAGTA    |                                |
| ZFY1R  | ATCACATTCGATGGCCCTTC    | M13R-GATTGTGTAACCTTATCTTCTT   | NW_017189885.1:<br>10983-12149 |
| ZFY2F  | ATATGCTTGAAGAGACGACAAC  | M13F-TTCATTTGATCACTCATGCTC    |                                |
| ZFY2R  | AGTCAGAAGACAAATGTCACA   | M13R-TATGGATTCGCATGTGCTT      |                                |
